# Supplementary material
Source: MDPI journal article supplement (https://www.mdpi.com/2073-4344/12/11/1307)
Supplement: s1 [file s1 › catalysts-1983606-supplementary.pdf]

## Supporting information

### Advanced high-loaded Ni-Cu catalysts in transfer hydrogenation of anisole: unexpected effect of Cu addition

Alexey A. Philippov\*, Nikolay S. Nesterov, Vera P. Pakharukova, Ivan. V. Kozhevnikov, Oleg N. Martyanov

Boreskov Institute of Catalysis, Siberian Branch of the Russian Academy of Sciences, Academician  
Lavrentiev Avenue 5, 630090, Novosibirsk, Russia

*E-mail address:* philippov@catalysis.ru (Alexey A. Philippov, +7-383-32-69-313)

In order to demonstrate stability of the catalysts used in this study the samples were analyzed by XRD after anisole treatment at 250 °C. As clearly seen in **Figure S1** the catalysts are presented by Ni<sup>0</sup> phase (PDF № 04-0850), at the same time, the mean crystallite size of metal nanoparticles does not exceed 7.0 nm (**Table S1**). The lattice parameter of Ni<sup>0</sup> phase is increased that shows the presence of Cu<sup>0</sup>. This fact demonstrates the absence of the phase separation after treatment TH of anisole at 250 °C. Thus, we can conclude that the properties of the catalyst do not change dramatically during TH.

**Table S1.** D – mean crystallite size, a – lattice parameter, measured by XRD for the catalysts treated in TH of anisole at 250 °C.

| Catalyst                      | D(Ni <sup>0</sup> ), nm | a(Ni <sup>0</sup> ), Å |
|-------------------------------|-------------------------|------------------------|
| Ni(36)-SiO <sub>2</sub>       | 7.0                     | 3.523                  |
| Ni(41)Cu(4)-SiO <sub>2</sub>  | 5.5                     | 3.528                  |
| Ni(36)Cu(14)-SiO <sub>2</sub> | 6.5                     | 3.553                  |

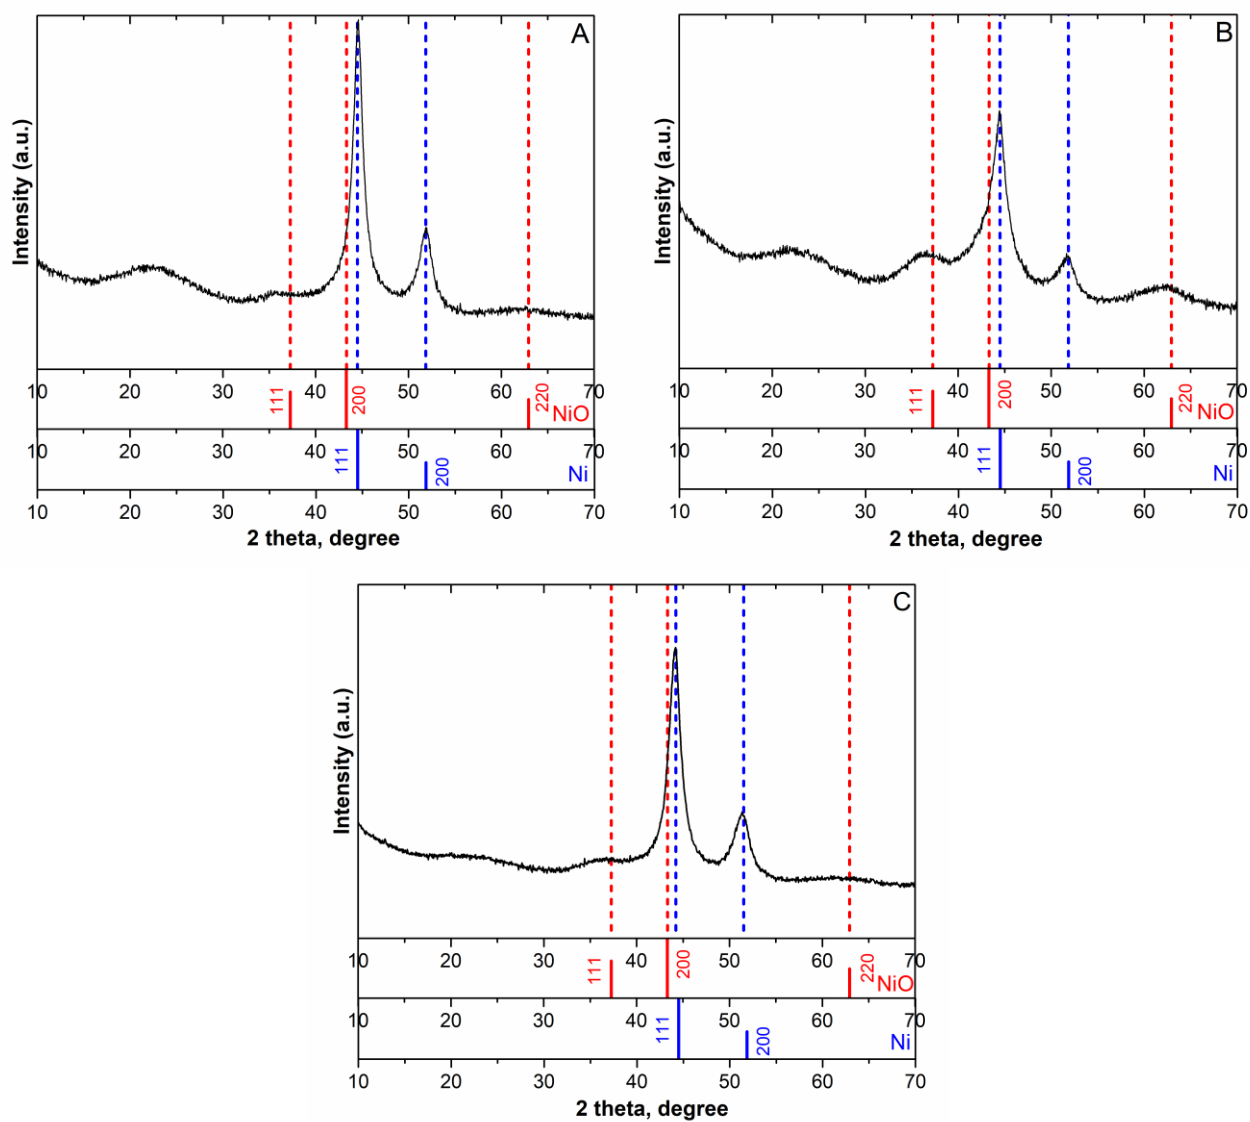

**Figure S1.** XRD data obtained for the catalysts after the 3 h treatment at 250 °C in anisole TH. A – Ni(36)-SiO<sub>2</sub>, B – Ni(41)Cu(4)-SiO<sub>2</sub>, C – Ni(36)Cu(14)-SiO<sub>2</sub>.

The kinetic constants were calculated accordingly the equations presented in the main text. To take into account the negative influence of acetone the pseudo-equilibrium constant  $K_{\text{acetone}}$  showing the ratio between acetone in the solution and on the catalyst surface was calculated (**Table S2**). Also, the rate constants of different pathways are provided. The same calculations were made for the experiments at 150 °C (**Table S3**).

**Table S2.** Rate constants of the product formation in the experiments at 250 °C. The constants were calculated using the least-square method with a kinetic model that would take into account the effect of acetone concentration on the rate of catalytic transformations,  $m(\text{catalyst}) = 0.10 - 0.11$  g.

| # | Catalyst                                  | $k_1^0 \times 10^4, \text{s}^{-1}$ | $k_2^0 \times 10^4, \text{s}^{-1}$ | $k_3^0 \times 10^4, \text{s}^{-1}$ | $k_4^0 \times 10^4, \text{s}^{-1}$ | $K_{\text{acetone}} \times 10^4, \text{s}^{-1} \text{mol}^{-1}$ |
|---|-------------------------------------------|------------------------------------|------------------------------------|------------------------------------|------------------------------------|-----------------------------------------------------------------|
| 1 | Ni(36)-SiO <sub>2</sub>                   | -                                  | -                                  | -                                  | -                                  | -                                                               |
| 2 | Ni(41)Cu(4)-SiO <sub>2</sub>              | 0.48                               | 2.99                               | 2.79                               | 0.53                               | 26.9                                                            |
| 3 | Ni(36)Cu(14)-SiO <sub>2</sub>             | 1.21                               | 7.04                               | 2.32                               | -                                  | 140.0                                                           |
| 4 | Ni(36)-SiO <sub>2</sub> <sup>*</sup>      | -                                  | -                                  | -                                  | -                                  | -                                                               |
| 5 | Ni(41)Cu(4)-SiO <sub>2</sub> <sup>*</sup> | 0.23                               | 1.63                               | 0.99                               | 0.16                               | 51.2                                                            |

\* 15 ml of 2-PrOH was replaced with 15 ml of acetone.

**Table S3.** Rate constants of product formation in the experiments at 150 °C. The constants were calculated using the least-square method with a kinetic model that would take into account the effect of acetone concentration on the rate of catalytic transformations,  $m(\text{catalyst}) = 0.36 - 0.37$  g.

| # | Catalyst                 | $k_1^0 \times 10^4, \text{s}^{-1}$ | $k_2^0 \times 10^4, \text{s}^{-1}$ | $k_3^0 \times 10^4, \text{s}^{-1}$ | $k_4^0 \times 10^4, \text{s}^{-1}$ | $K_{\text{acetone}} \times 10^4, \text{s}^{-1} * \text{mol}^{-1} * \text{l}$ |
|---|--------------------------|------------------------------------|------------------------------------|------------------------------------|------------------------------------|------------------------------------------------------------------------------|
| 1 | Ni-SiO <sub>2</sub>      | -                                  | -                                  | -                                  | -                                  | -                                                                            |
| 2 | Ni10Cu-SiO <sub>2</sub>  | 0.10                               | 0.93                               | 0.55                               | -                                  | 310                                                                          |
| 3 | Ni2.5Cu-SiO <sub>2</sub> | 0.10                               | 0.94                               | 0.31                               | -                                  | 440                                                                          |

The reaction mixtures were analyzed by GC-MS and **Figure S2** shows the example of chromatogram obtained for the initial reaction mixture (A) and the final reaction mixture (B).

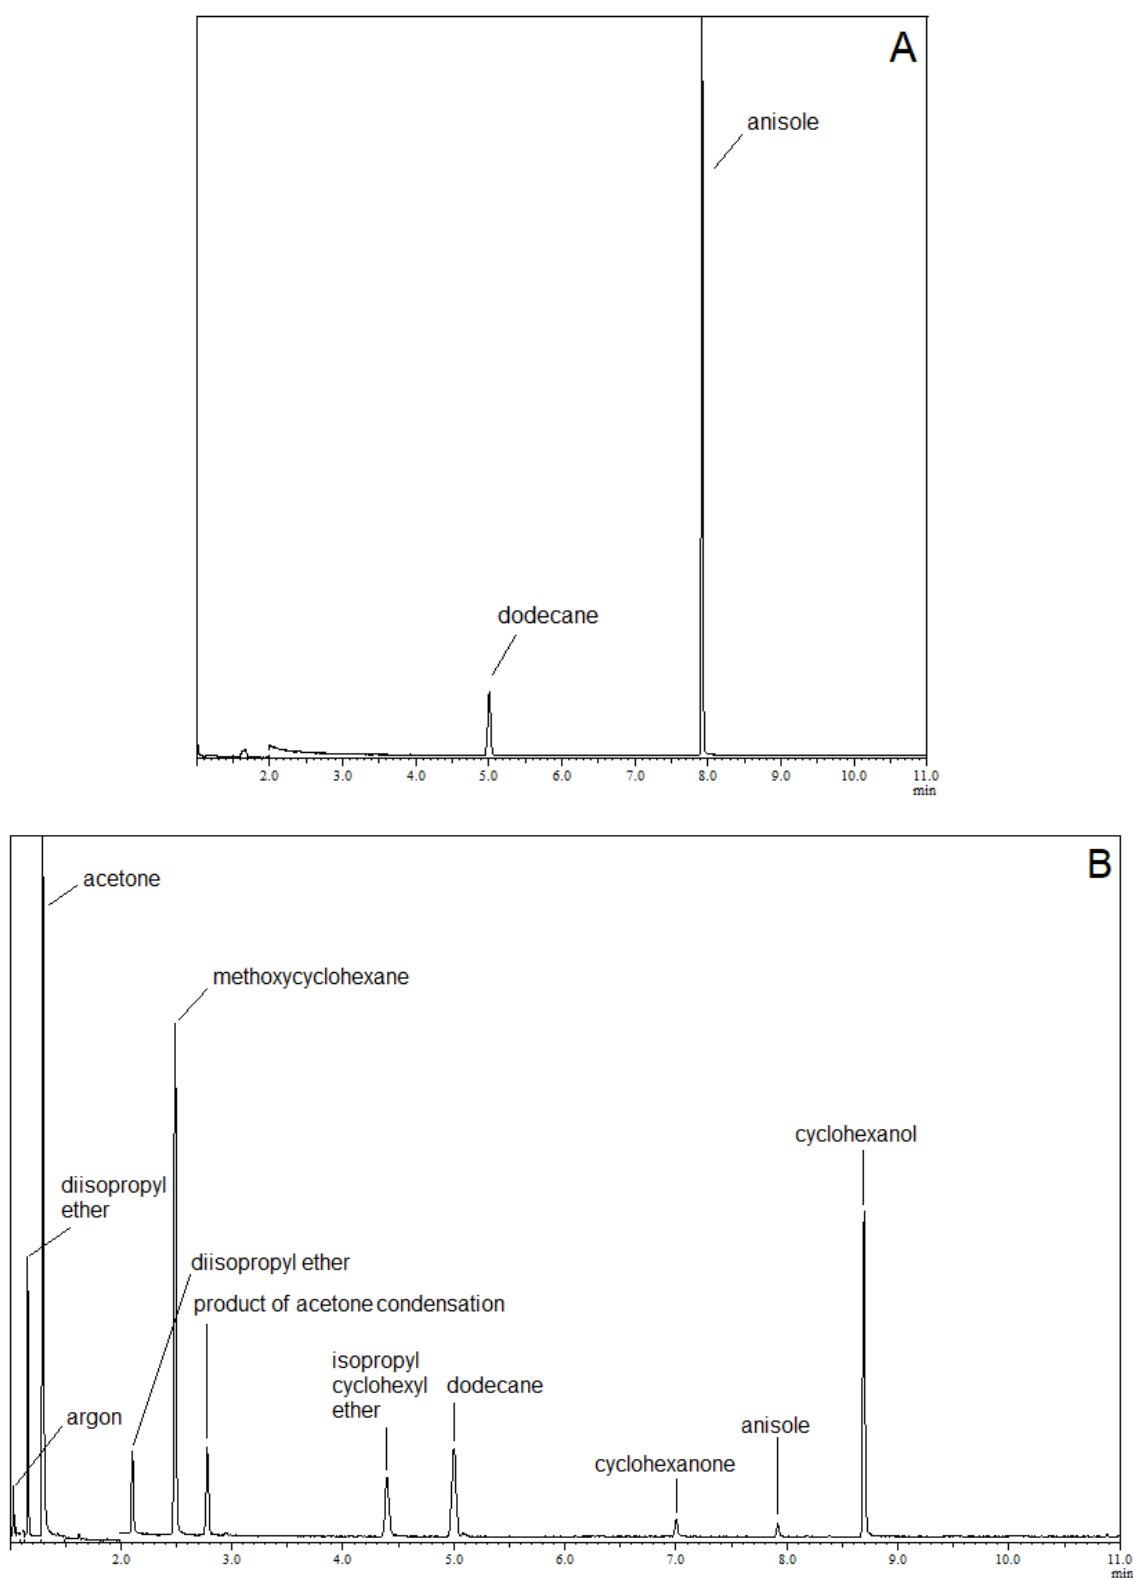

**Figure S2.** Examples of chromatograms of an initial reaction mixture (A) and a final reaction mixture (B).
